# Supplementary material for: Impact of snow deposition on major and trace element concentrations and elementary fluxes in surface waters of the Western Siberian Lowland across a 1700 km latitudinal gradient
Source: Copernicus journal article supplement (doi:10.5194/hess-21-5725-2017), 2017-11-17
Supplement: Supplementary file 1 [file hess-21-5725-2017-supplement.pdf]

Supplement of Hydrol. Earth Syst. Sci., 21, 5725–5746, 2017  
<https://doi.org/10.5194/hess-21-5725-2017-supplement>  
© Author(s) 2017. This work is distributed under  
the Creative Commons Attribution 3.0 License.

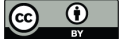

*Supplement of*

**Impact of snow deposition on major and trace  
element concentrations and elementary fluxes in  
surface waters of the Western Siberian Lowland  
across a 1700 km latitudinal gradient**

**Vladimir P. Shevchenko et al.**

*Correspondence to:* Oleg S. Pokrovsky ([oleg.pokrovsky@get.omp.eu](mailto:oleg.pokrovsky@get.omp.eu))

The copyright of individual parts of the supplement might differ from the CC BY 3.0 License.

## SUPPLEMENTARY INFORMATION

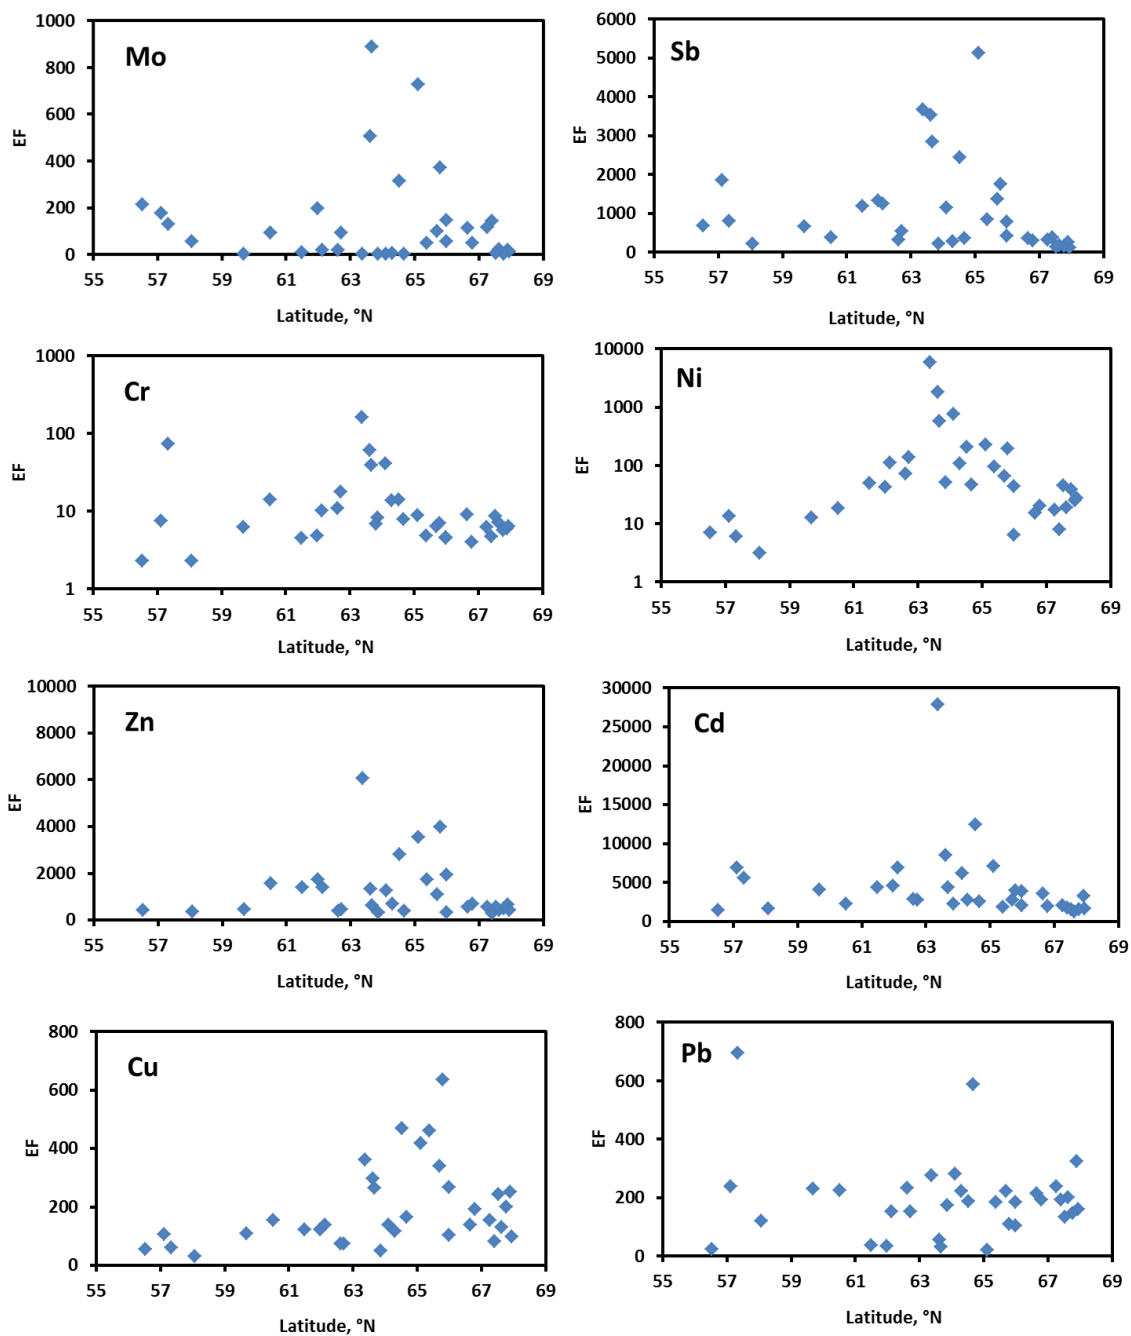

**Fig. S1.** The Al-based enrichment factors (relative to the upper part of continental earth crust) of particulate fraction of snow for Mo, Sb, Cr, Ni, Zn, Cd, Cu and Pb as a function of latitude.

5

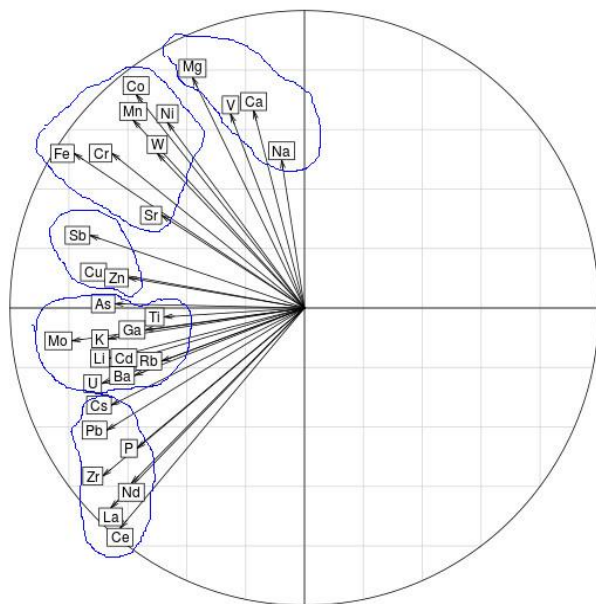**A**

15

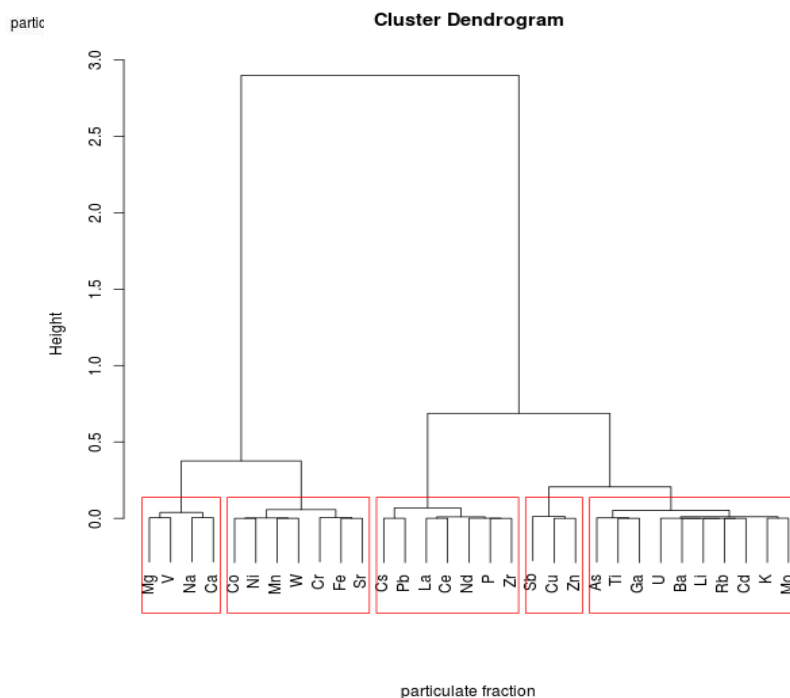**B****B**

25

30

**Fig. S2 A.** PCA Factorial map F1x2 of variables (elements) of a reconstructed table for the particulate fraction. Partition of elements into 5 groups revealed by HCA is reported by a contour line. **B:** Dendrogram of a hierarchical cluster analysis (HCA) performed on variables of a reconstructed table for the particulate fraction using Pearson correlation distance as distance measure and Ward's method for the linkage rule.

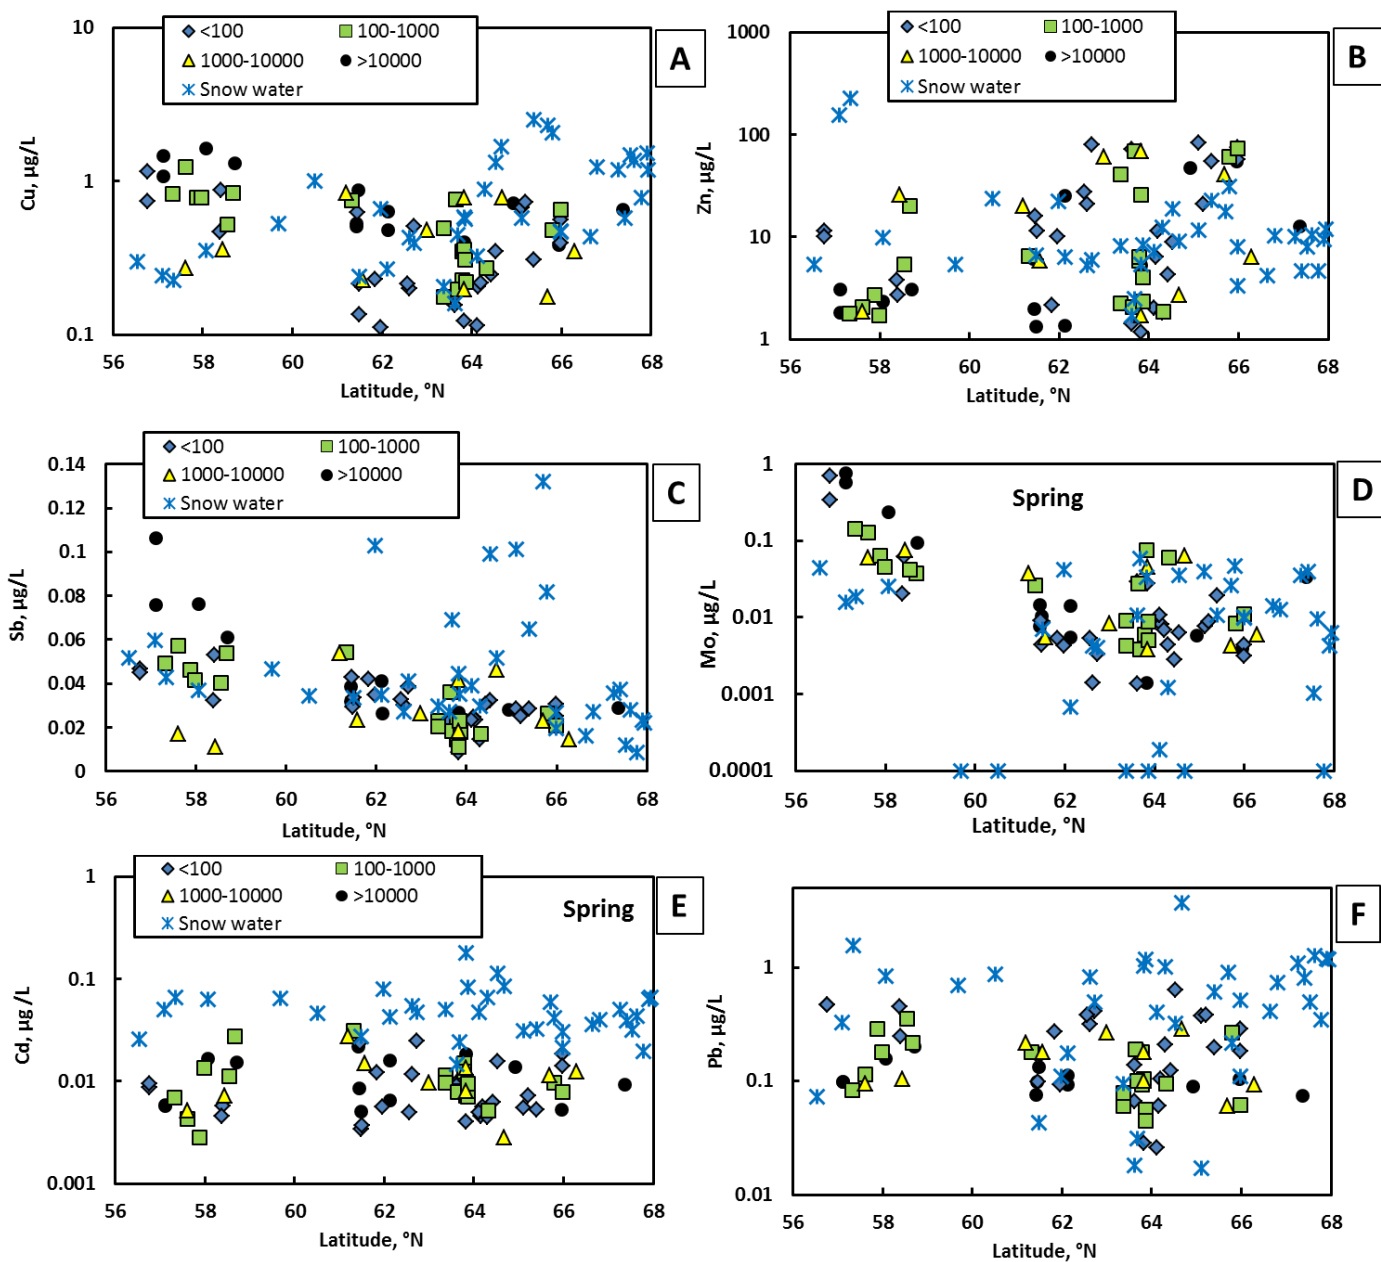

**Fig. S3.** Snow water soluble (< 0.45 µm) of Zn (A), Cu (B), Cd (C), Pb (D), Sb (E) and Mo (F) (blue asterisk) compared with actual concentrations in rivers during spring flood (May-June) of different size of the watershed (closed diamonds, squares, triangles and circles correspond to < 100, 100-1000, 1000-10,000 and > 10,000 km<sup>2</sup> surface area, respectively) in western Siberia along the latitudinal gradient.

5

**Table S1.** Mineralogical composition of selected snow particles.

| No    | Quartz | Albite | K-Fs | Calcite | Dolomite | Chlorite | Illite | Phlogopite | Amphibole | Pyroxene | Chrysotile | Magnesite | Forsterite | Talc | Magnetite |
|-------|--------|--------|------|---------|----------|----------|--------|------------|-----------|----------|------------|-----------|------------|------|-----------|
| SF-1  | 37     | 20     | 11   | 19      | < 1      | 4        | 7      |            | 2         |          |            |           |            |      |           |
| SF-3  | 38     | 27     | 9    | 3       |          | 10       | 9      |            | 3         |          |            |           |            |      |           |
| SF-14 | 20     | 8      | 6    | 1       | 48       | 5        | 4      |            | 3         | 1        | 2          |           |            | 1    |           |
| SF-31 | 30     | 20     | 12   |         | 8        | 8        |        | 12         | 6         |          | 3          |           |            |      |           |
| SF-33 | 35     | 16     | 9    |         | 10       | 3        |        | 16         | 4         |          | 3          | 4         |            |      |           |
| SF-36 | 47     | 7      | 11   |         | 1        | 4        |        | 5          | 3         | 3        | 12         |           | 4          | 3    |           |
| SF-38 | 48     | 3      | 6    |         | 1        | 6        |        | 4          | 3         |          | 16         |           | 6          | 4    | 3         |
| SF-39 | 41     | 8      | 6    | 4       | 8        | 5        |        | 12         | 2         | 2        | 8          |           | 2          | 2    |           |
| SF-40 | 35     | 12     | 9    | 6       | 3        | 4        |        | 8          | 4         | 3        | 10         |           | 4          | 2    |           |
